# Supplementary material for: MED12 mutations and FH inactivation are mutually exclusive in uterine leiomyomas
Source: PubMed Central journal article supplement — Br J Cancer. 2016 May 17;114(12):1405–11. doi: 10.1038/bjc.2016.130 (PMC4984459; doi:10.1038/bjc.2016.130), 2016-05-17
Supplement: bjc2016130x1.pdf [file bjc2016130x1.pdf]

Supplemental table 1. Primers used in the sequencing

| <b>MED12</b>        | <b>forward</b>            | <b>reverse</b>           |
|---------------------|---------------------------|--------------------------|
| MED12_ex1           | CCTCCGGAACGTTTCATAGAT     | TTCGGGACTTTTGCTCTCAC     |
| MED12_ex1_paraffin  | CCCCTTTTCGGCTCCCTC        | GTCAGTGCCTCCTCCTAGG      |
| MED12_ex2_paraffin  | GCCCTTTCACCTTGTTTCCTT     | AAGCTGACGTTCTTGGA        |
| MED12_ex2           | GCCCTTTCACCTTGTTTCCTT     | TGTCCTATAAGTCTTCCAACC    |
| <b>FH</b>           | <b>forward</b>            | <b>reverse</b>           |
| FH_1                | TGTGAGGCTGTTGATTGGAT      | GGAGGGCTGAAGGCTCACTG     |
| FH_2                | AAGATGCGATTACTTTTGATCC    | TGAATACAGCCTACTTCATCAA   |
| FH_3                | CTGCCAAAATAATAAACTTCCATGC | GCCAGAGCATATCGTCATCC     |
| FH_4                | AAACTCTGTGGCATAATCAGCA    | CAAGAACAATCTCAGGTATGCTTT |
| FH_5                | GCTGGGTTTTGAGTAGTTAGTTGG  | GGCCATTTGTACCAAGCTCT     |
| FH_6                | TCAGTGGCATTGTCGTACCT      | CACAAGAATTCAAGACAGGAACA  |
| FH_7                | TTCTGTTTCACTTGCTAATGGTAGA | GGACCTAGTCAAGTTTTAGCTCCA |
| FH_8                | ATGGTTGGGCCTTGCTTTAT      | CCAAGATAATAAGCCTTTGGTCA  |
| FH_9                | CATGTTGCCTTAGTAATGTCTCTC  | TGCTGTTCTCAAACACTGATCC   |
| FH_10               | CAATTATGTCACCTTTTGCTTTAGG | GCAGTTTCCTTTCAAACCTTATCC |
| FH_Ex10-I_paraffin  | TCACCTTTTGCTTTAGGAAACC    | AAATCACTTTGGACCCAGCA     |
| FH_Ex10-II_paraffin | TCTCACAGCAGAGCAGTTTG      | CCTAGCACATCCTAGGGTTTT    |
