# Supplementary material for: MED12 mutations and FH inactivation are mutually exclusive in uterine leiomyomas
Source: PubMed Central journal article supplement — Br J Cancer. 2016 May 17;114(12):1405–11. doi: 10.1038/bjc.2016.130 (PMC4984459; doi:10.1038/bjc.2016.130), 2016-05-17
Supplement: bjc2016130x2.pdf [file bjc2016130x2.pdf]

|           |              |                          |   |                                     |
|-----------|--------------|--------------------------|---|-------------------------------------|
| M_27      | FFPE         | c.671_672delAG; p.E224fs | + | wt                                  |
| M_27      | FFPE         | c.671_672delAG; p.E224fs | + | wt                                  |
| M_27      | FFPE         | c.671_672delAG; p.E224fs | + | wt                                  |
| M_27      | FFPE         | c.671_672delAG; p.E224fs | + | wt                                  |
| M_31      | FFPE         | c.671_672delAG; p.E224fs | + | wt                                  |
| M_31      | FFPE         | c.671_672delAG; p.E224fs | + | wt                                  |
| M_31      | FFPE         | c.671_672delAG; p.E224fs | + | wt                                  |
| M_51      | FFPE         | c.671_672delAG; p.E224fs | + | wt                                  |
| M_51      | FFPE         | c.671_672delAG; p.E224fs | + | wt                                  |
| M_51      | FFPE         | c.671_672delAG; p.E224fs | + | wt                                  |
| M_51      | FFPE         | c.671_672delAG; p.E224fs | + | wt                                  |
| M_51      | FFPE         | c.671_672delAG; p.E224fs | + | wt                                  |
| N_7       | Fresh frozen | c.1027C>T; p.R343X       | + | wt                                  |
| N_7       | Fresh frozen | c.1027C>T; p.R343X       | + | wt                                  |
| N_7       | Fresh frozen | c.1027C>T; p.R343X       | + | wt                                  |
| N_7       | Fresh frozen | c.1027C>T; p.R343X       | + | wt                                  |
| N_7       | Fresh frozen | c.1027C>T; p.R343X       | + | wt                                  |
| N_7       | Fresh frozen | c.1027C>T; p.R343X       | + | wt                                  |
| KH-80_3   | FFPE         | c.587A>G; p.H196R        | + | wt                                  |
| KH-80_3   | FFPE         | c.587A>G; p.H196R        | + | wt                                  |
| KH-80_3   | FFPE         | c.587A>G; p.H196R        | + | wt                                  |
| KH-80_3   | FFPE         | c.587A>G; p.H196R        | + | wt                                  |
| KH-80_3   | FFPE         | c.587A>G; p.H196R        | + | wt                                  |
| MG_56     | FFPE         | c.671_672delAG; p.E224fs | + | wt                                  |
| MG_56     | FFPE         | c.671_672delAG; p.E224fs | + | wt                                  |
| MG_56     | FFPE         | c.671_672delAG; p.E224fs | + | wt                                  |
| MG_56     | FFPE         | c.671_672delAG; p.E224fs | + | wt                                  |
| MG_56_3   | FFPE         | c.671_672delAG; p.E224fs | + | wt                                  |
| MG_56_3   | FFPE         | c.671_672delAG; p.E224fs | + | wt                                  |
| MG_56_3   | FFPE         | c.671_672delAG; p.E224fs | + | wt                                  |
| MG_56_3   | FFPE         | c.671_672delAG; p.E224fs | + | wt                                  |
| MG_56_3   | FFPE         | c.671_672delAG; p.E224fs | + | wt                                  |
| MG_56_3   | FFPE         | c.671_672delAG; p.E224fs | + | wt                                  |
| MG_56_3   | FFPE         | c.671_672delAG; p.E224fs | + | wt                                  |
| OuluM1_1  | FFPE         | c.583A>G; p.M195V        | + | wt                                  |
| OuluM1_3  | FFPE         | c.583A>G; p.M195V        | + | wt                                  |
| OuluM1_18 | FFPE         | c.583A>G; p.M195V        | + | wt                                  |
| OuluM1_18 | FFPE         | c.583A>G; p.M195V        | + | wt                                  |
| OuluM1_18 | FFPE         | c.583A>G; p.M195V        | + | wt                                  |
| OuluM1_18 | FFPE         | c.583A>G; p.M195V        | + | wt                                  |
| My5006    | Fresh frozen | c.583A>C, p.M195V        | + | wt                                  |
| My5006    | Fresh frozen | c.583A>C, p.M195V        | + | wt                                  |
| My5006    | Fresh frozen | c.583A>C, p.M195V        | + | wt                                  |
| My5006    | Fresh frozen | c.583A>C, p.M195V        | + | wt                                  |
| My5006    | Fresh frozen | c.583A>C, p.M195V        | + | wt                                  |
| My5006    | Fresh frozen | c.583A>C, p.M195V        | + | wt                                  |
| My5006    | Fresh frozen | c.583A>C, p.M195V        | + | wt                                  |
| My5006    | Fresh frozen | c.583A>C, p.M195V        | + | wt                                  |
| My5006    | Fresh frozen | c.583A>C, p.M195V        | + | wt                                  |
| My5006    | Fresh frozen | c.583A>C, p.M195V        | + | wt                                  |
| My5006    | Fresh frozen | c.583A>C, p.M195V        | + | wt                                  |
| My5006    | Fresh frozen | c.583A>C, p.M195V        | + | wt                                  |
| My5006    | Fresh frozen | c.583A>C, p.M195V        | + | wt                                  |
| My5006    | Fresh frozen | c.583A>C, p.M195V        | + | wt                                  |
| My5006    | Fresh frozen | c.583A>C, p.M195V        | + | wt                                  |
| My5006    | Fresh frozen | c.583A>C, p.M195V        | + | wt                                  |
| My31      | Fresh frozen | c.1439C>G, p. S480X      | - | <b>c.130G&gt;A, p.G44S</b>          |
| My31      | Fresh frozen | c.1439C>G, p. S480X      | - | <b>c.131G&gt;T, p.G44V</b>          |
| My31      | Fresh frozen | c.1439C>G, p. S480X      | - | <b>IVS1-1_139del41</b>              |
| My31      | Fresh frozen | c.1439C>G, p. S480X      | - | <b>IVS1-8T&gt;A, p.E33_D34insPQ</b> |
| My31      | Fresh frozen | c.1439C>G, p. S480X      | - | <b>c.131G&gt;A, p.G44D</b>          |
| My31      | Fresh frozen | c.1439C>G, p. S480X      | - | <b>c.130G&gt;C, p.G44R</b>          |
