# Supplementary material for: MED12 mutations and FH inactivation are mutually exclusive in uterine leiomyomas
Source: PubMed Central journal article supplement — Br J Cancer. 2016 May 17;114(12):1405–11. doi: 10.1038/bjc.2016.130 (PMC4984459; doi:10.1038/bjc.2016.130), 2016-05-17
Supplement: bjc2016130x3.pdf [file bjc2016130x3.pdf]

Supplemental table 3. Results of 2SC immunohistochemical staining and *MED12* exon 1/2 mutation status of 66 sporadic uterine leiomyomas.

| Sporadic conventional uterine leiomyoma | Tissue material | 2SC | Somatic <i>MED12</i> mutation    |
|-----------------------------------------|-----------------|-----|----------------------------------|
| 1                                       | FFPE            | -   | c.130G>T, p.G44C                 |
| 2                                       | FFPE            | -   | c.131G>A, p.G44D                 |
| 3                                       | FFPE            | -   | c.131G>A, p.G44D                 |
| 4                                       | FFPE            | -   | c.131G>A, p.G44D                 |
| 5                                       | FFPE            | -   | c.117-134del18, p.L39_G44delinsF |
| 6                                       | FFPE            | -   | wt                               |
| 7                                       | FFPE            | -   | IVS1-22_102del25                 |
| 8                                       | FFPE            | -   | c.131G>A, p.G44D                 |
| 9                                       | FFPE            | -   | wt                               |
| 10                                      | FFPE            | -   | wt                               |
| 11                                      | FFPE            | -   | wt                               |
| 12                                      | FFPE            | -   | wt                               |
| 13                                      | FFPE            | -   | wt                               |
| 14                                      | FFPE            | -   | c.130G>T, p.G44C                 |
| 15                                      | FFPE            | -   | wt                               |
| 16                                      | FFPE            | -   | wt                               |
| 17                                      | FFPE            | -   | c.107T>G, p.L36R                 |
| 18                                      | FFPE            | -   | wt                               |
| 19                                      | FFPE            | -   | c.122T>A, p.V41E                 |
| 20                                      | FFPE            | -   | wt                               |
| 21                                      | FFPE            | -   | wt                               |
| 22                                      | FFPE            | -   | wt                               |
| 23                                      | FFPE            | -   | c.131G>A, p.G44D                 |
| 24                                      | FFPE            | -   | IVS1-11_IVS1-2del10              |
| 25                                      | FFPE            | -   | c.131G>A, p.G44D                 |
| 26                                      | FFPE            | -   | c.146_166del21, p.P49_E55del     |
| 27                                      | FFPE            | -   | wt                               |
| 28                                      | FFPE            | -   | c.131G>A, p.G44D                 |
| 29                                      | FFPE            | -   | c.130G>C, p.G44R                 |
| 30                                      | FFPE            | -   | wt                               |
| 31                                      | FFPE            | -   | wt                               |
| 32                                      | FFPE            | -   | wt                               |
| 33                                      | FFPE            | -   | c.141_155del15, p.Q48_S52del     |
| 34                                      | FFPE            | -   | c.128A>C, p.Q43P                 |
| 35                                      | FFPE            | -   | wt                               |
| 36                                      | FFPE            | -   | c.131G>A, p.G44D                 |
| 37                                      | FFPE            | -   | wt                               |
| 38                                      | FFPE            | -   | c.107T>G, p.L36R                 |
| 39                                      | FFPE            | -   | wt                               |
| 40                                      | FFPE            | -   | wt                               |
| 41                                      | FFPE            | -   | c.131G>A, p.G44D                 |
| 42                                      | FFPE            | -   | wt                               |
| 43                                      | FFPE            | -   | c.130G>C, p.G44R                 |
| 44                                      | FFPE            | -   | c.100_117del18, p.D34_L39del     |
| 45                                      | FFPE            | -   | c.131G>T, p.G44V                 |
| 46                                      | FFPE            | -   | c.130G>T, p.G44C                 |

|    |      |   |                                  |
|----|------|---|----------------------------------|
| 47 | FFPE | - | NA                               |
| 48 | FFPE | - | wt                               |
| 49 | FFPE | - | c.118_144del27, p.N40_Q48del     |
| 50 | FFPE | - | wt                               |
| 51 | FFPE | - | NA                               |
| 52 | FFPE | - | wt                               |
| 53 | FFPE | - | c.105_119del15, p.E35_N40delinsD |
| 54 | FFPE | - | c.107T>G, p.L36R                 |
| 55 | FFPE | - | wt                               |
| 56 | FFPE | - | c.131G>C, p.G44A                 |
| 57 | FFPE | - | c.131G>A, p.G44D                 |
| 58 | FFPE | - | c.130G>C, p.G44R                 |
| 59 | FFPE | - | c.130G>C, p.G44R                 |
| 60 | FFPE | - | wt                               |
| 61 | FFPE | - | c.121_138del18, p.V41_N46del     |
| 62 | FFPE | - | c.131G>A, p.G44D                 |
| 63 | FFPE | - | c.131G>A, p.G44D                 |
| 64 | FFPE | - | wt                               |
| 65 | FFPE | - | wt                               |
| 66 | FFPE | - | wt                               |
